# Supplementary material for: Aneuploidization under segmental allotetraploidy in rice and its phenotypic manifestation
Source: PubMed Central journal article supplement (PMC5945760; doi:10.1007/s00122-018-3077-7), 2018-02-24

**Dataset 3.** A total of 55 distinct aneuploid karyotypes identified in the segmental allotetraploid rice population (at S4) based on whole-genome resequencing.

Each of the 12 rice chromosomes were given blue dots to denote the centromere position. Each dot represents the sequencing depth of a 10 kb-sized bin with the y-axis indicating the actual sequencing depth. The upper and lower horizontal dashed lines are the average sequencing depth of the specific individual  $\times$  the average coverage thresholds of loss and gain of one chromosomes, respectively. The blue horizontal solid lines represent the average sequencing depth of the specific individual for all 12 chromosomes.

**#1 (+1 Chr. 01)**

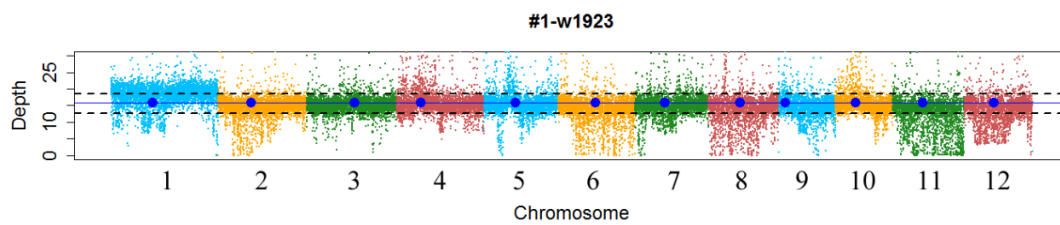

**#2 (- 1 Chr. 02)**

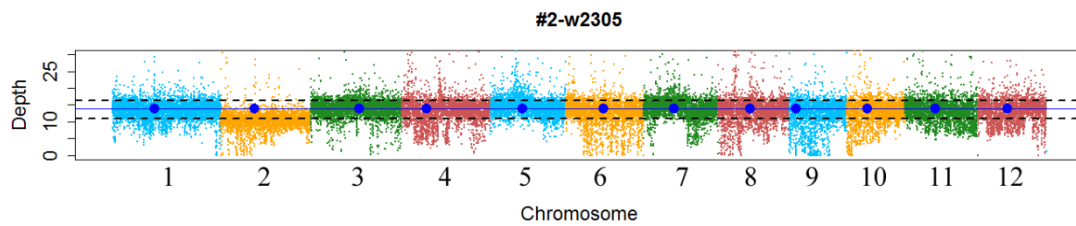

**#3 (+1 Chr. 02)**

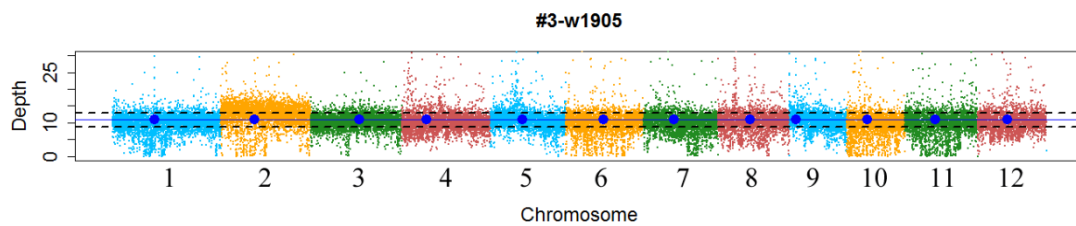

**#4 (-1 Chr. 03)**

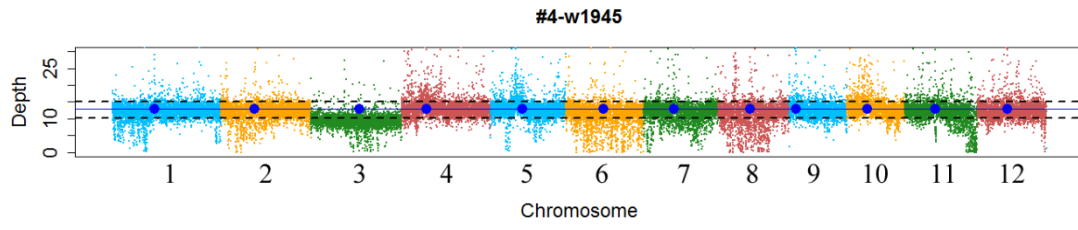

**#5 (-1 Chr. 04)**

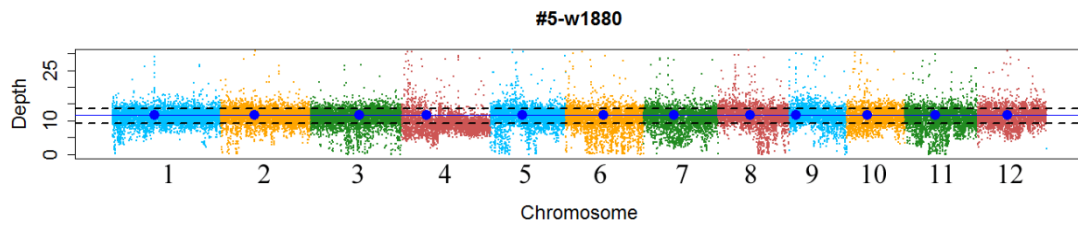

**#6 (+1 Chr. 04)**

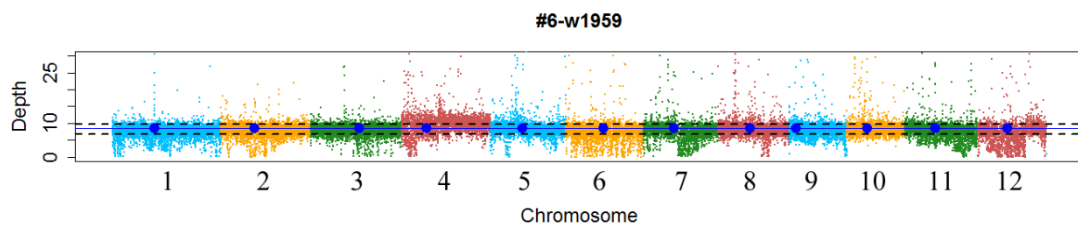

**#7 (-1 Chr. 05)**

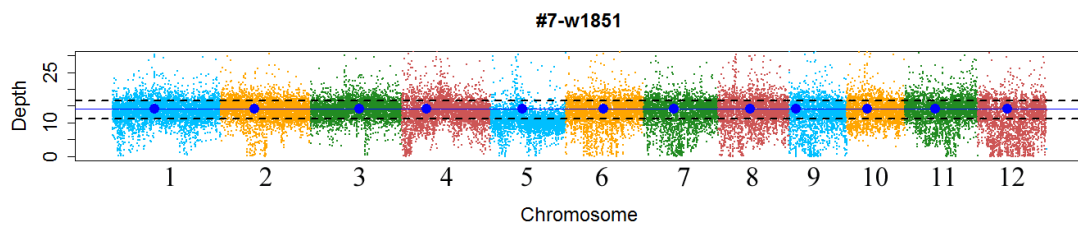

**#8 (+1 Chr. 05)**

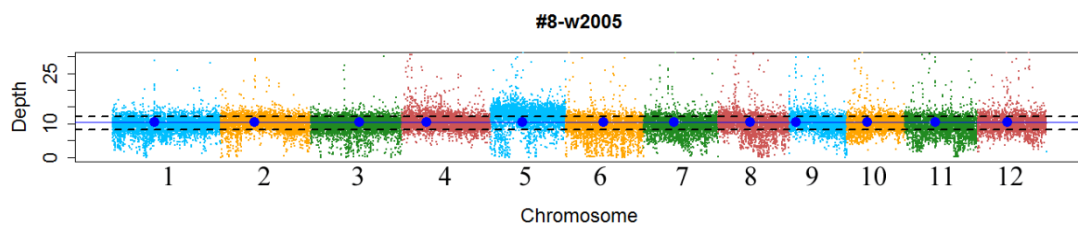

**#9 (-1 Chr. 06)**

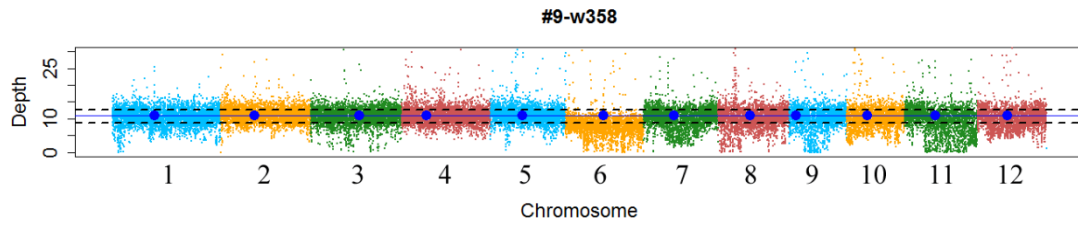

**#10 (+1 Chr. 06)**

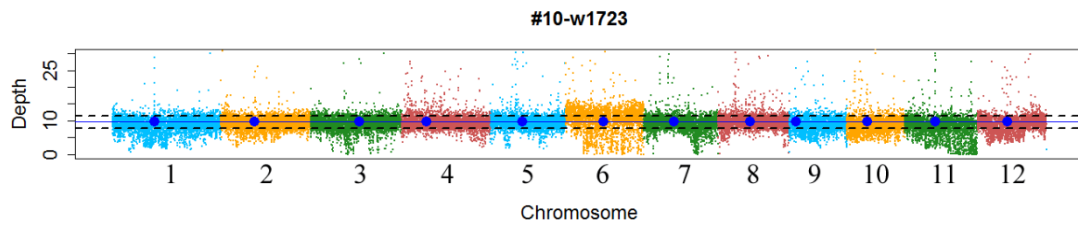

**#11 (-1 Chr. 07)**

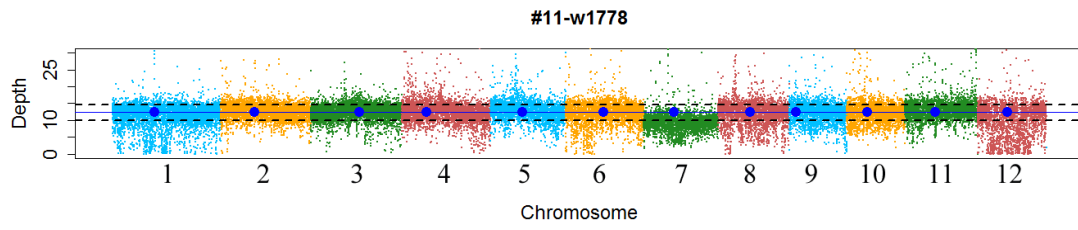

**#12 (+1 Chr. 07)**

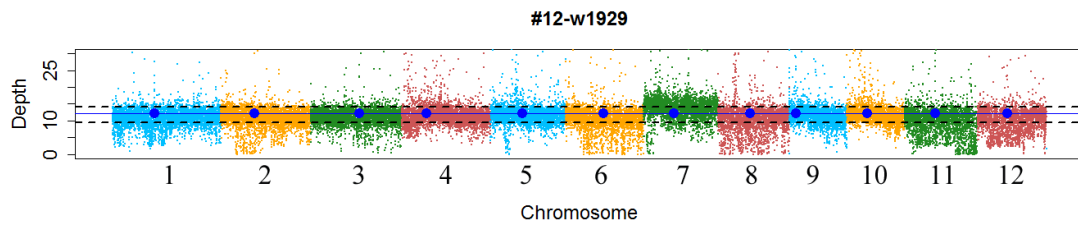

**#13 (+1 Chr. 08)**

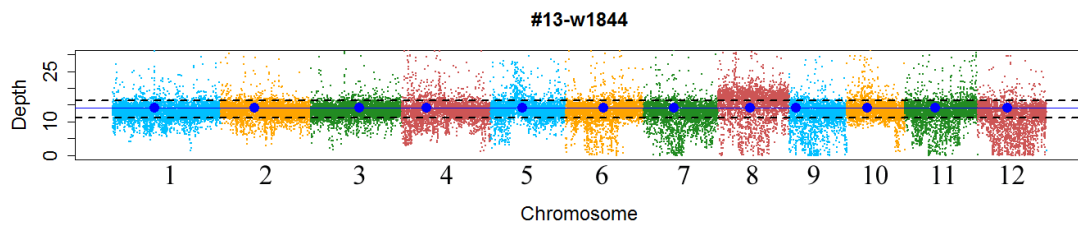

**#14 (-1 Chr. 09)**

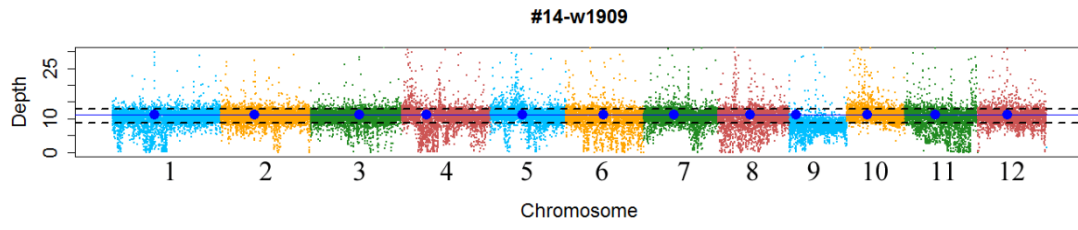

**#15 (+1 Chr. 09)**

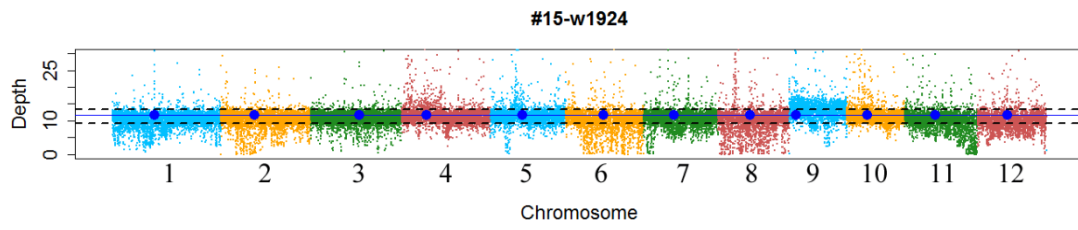

**#16 (-1 Chr. 10)**

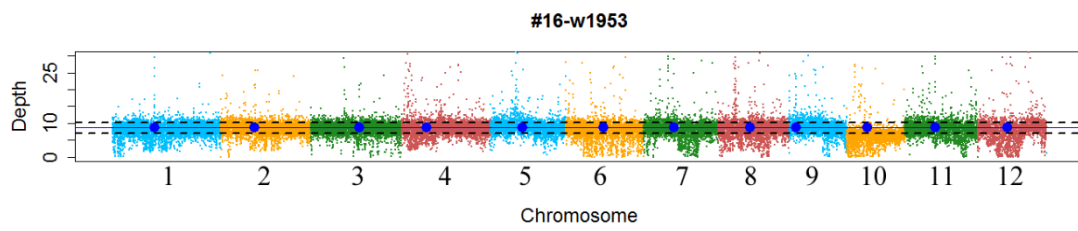

**#17 (+1 Chr. 10)**

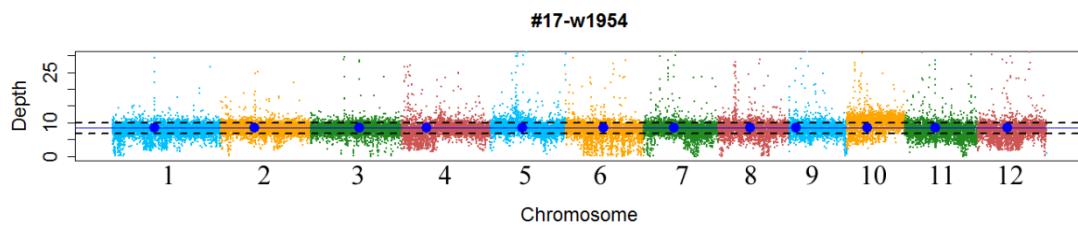

**#18 (-1 Chr. 11)**

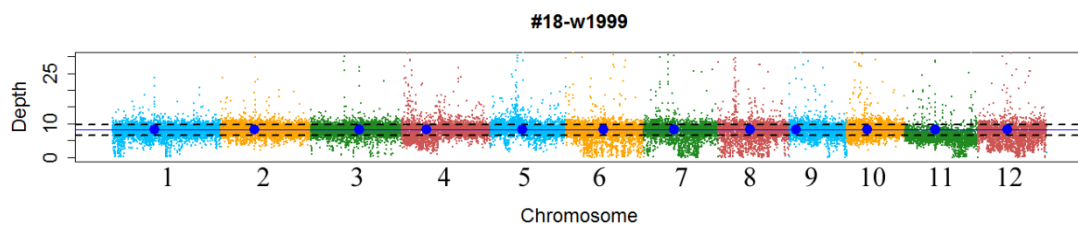

**#19 (+1 Chr. 11)**

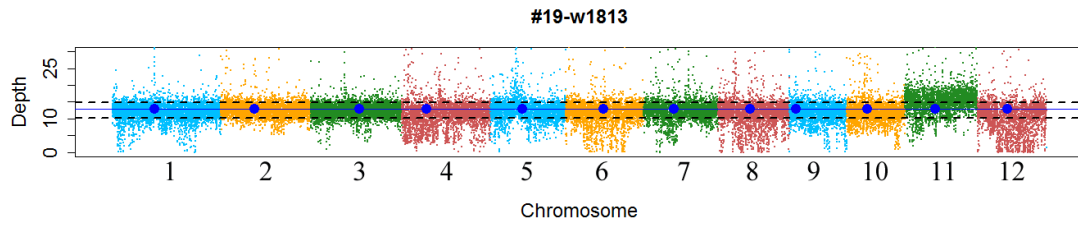

**#20 (-1 Chr. 12)**

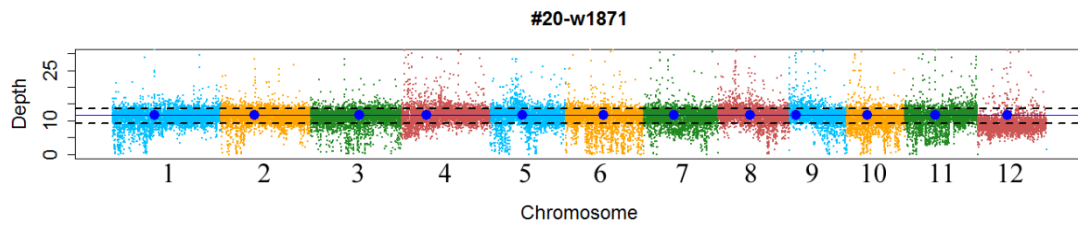

**#21 (+1 Chr. 12)**

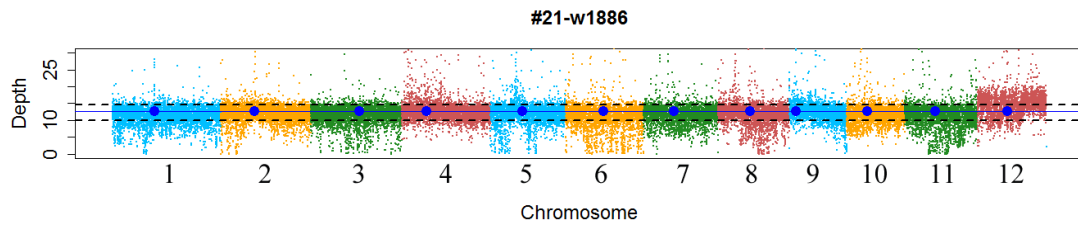

**#22 (+2 Chr. 10)**

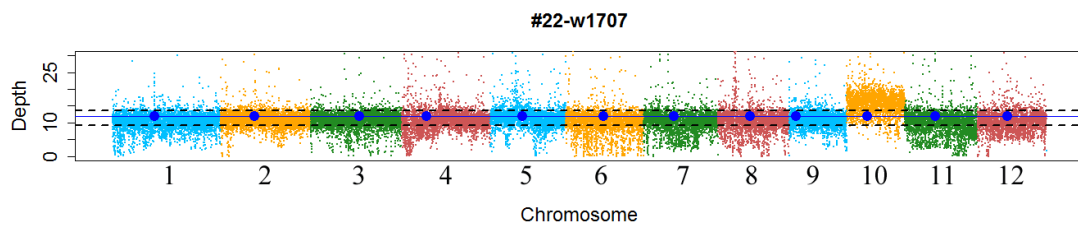

**#23 (+2S Chr. 10)**

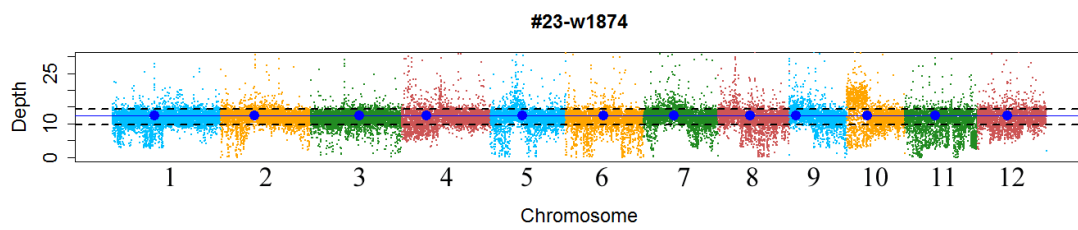

**#24 (+2 Chr. 11)**

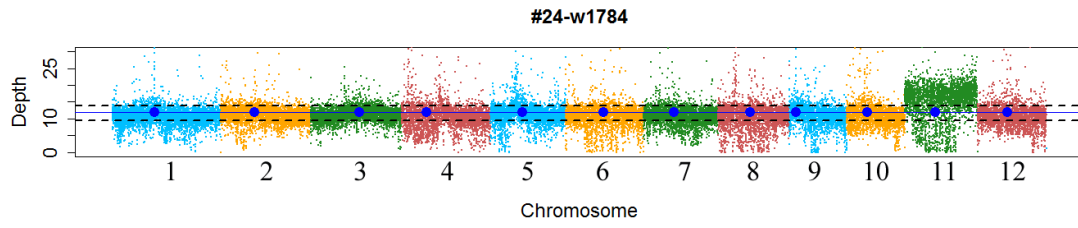

**#25 (-1L Chr. 11)**

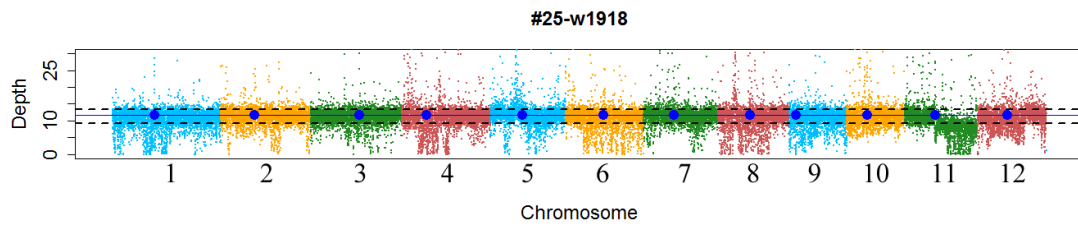

**#26 (+1S Chr. 11)**

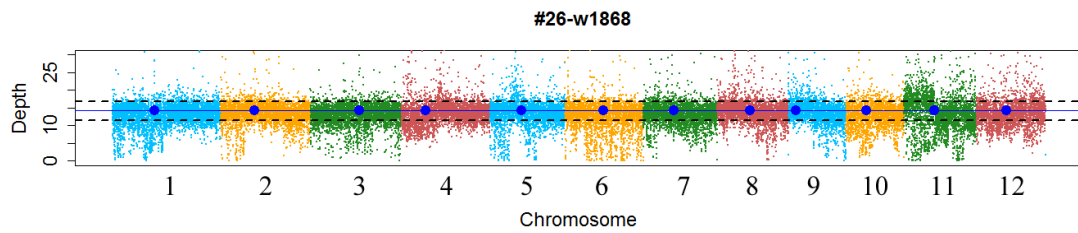

**#27 (+2 Chr. 12)**

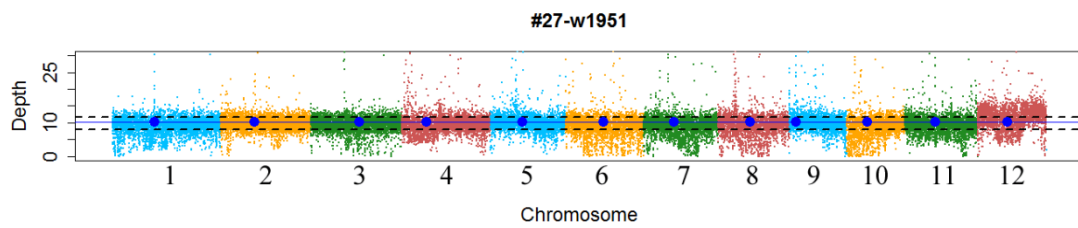

**#28 (+1 Chr. 01; +1 Chr. 09)**

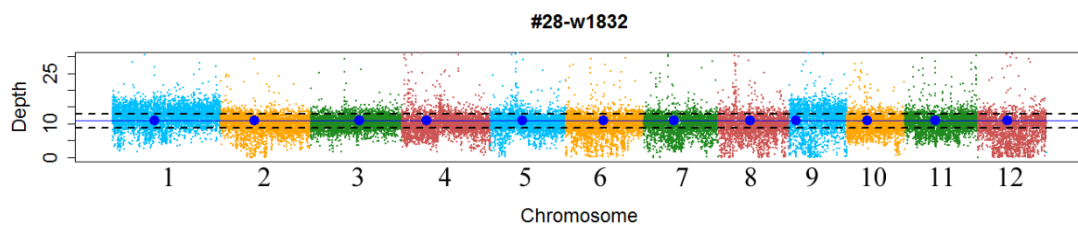

**#29 (+1 Chr. 01; -1 Chr. 10)**

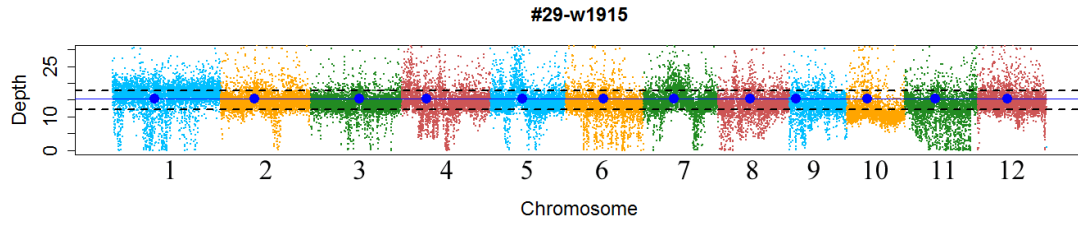

**#30 (+1 Chr. 02; +1 Chr. 06)**

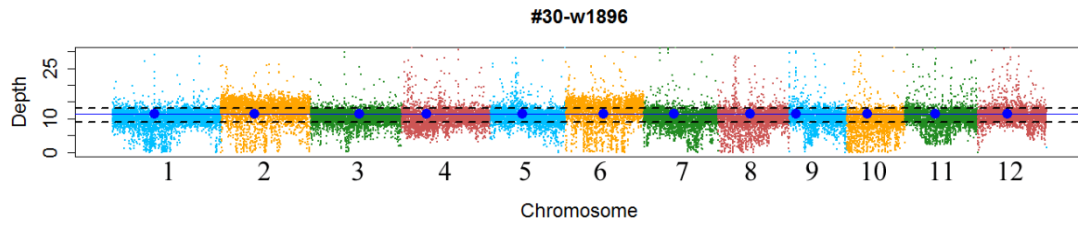

**#31 (-1 Chr. 02; +1 Chr. 04)**

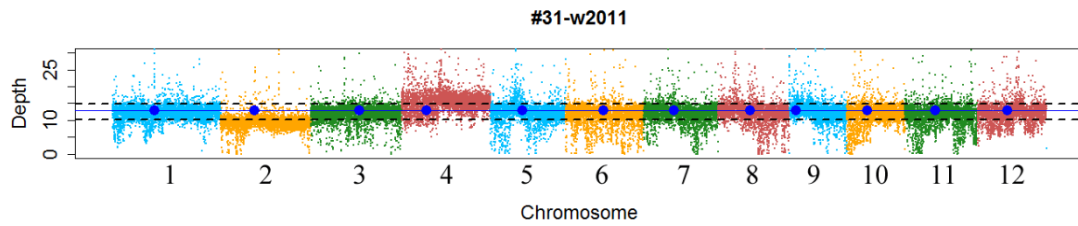

**#32 (-1 Chr. 02; +1 Chr. 05)**

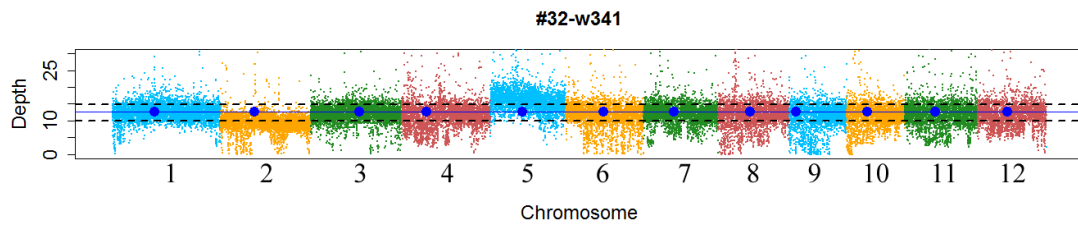

**#33 (+1 Chr. 03; +1 Chr. 04)**

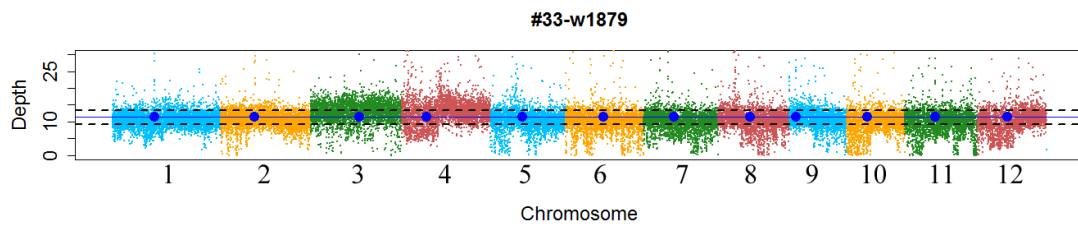

**#34 (+1 Chr. 04; -1 Chr. 08)**

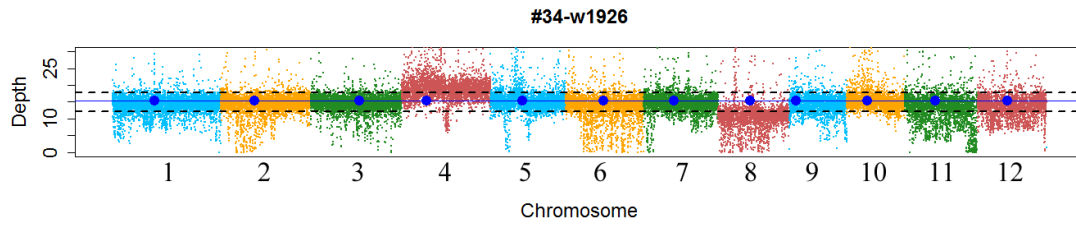

**#35 (+1 Chr. 04; -1 Chr. 09)**

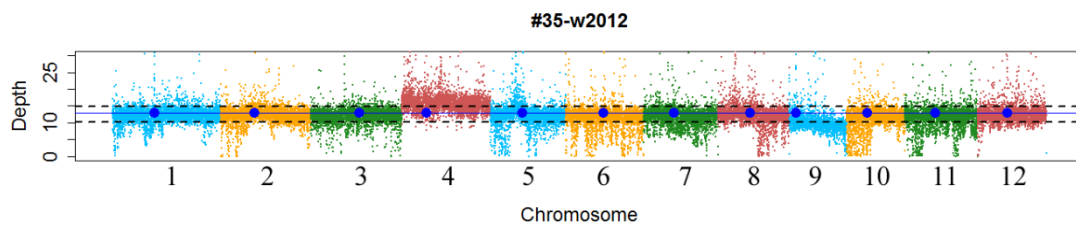

**#36 (+1 Chr. 04; +1 Chr. 11)**

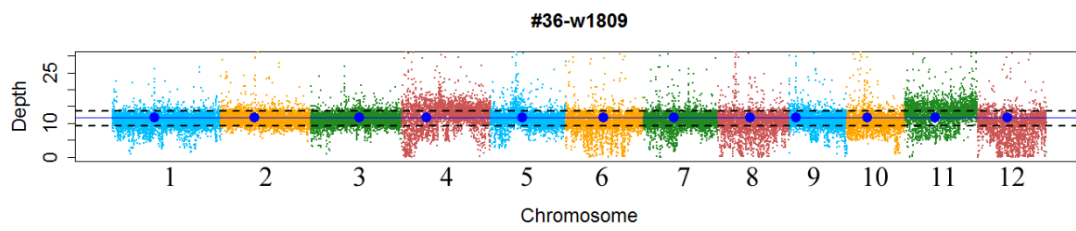

**#37 (-1 Chr. 04; +1 Chr. 08)**

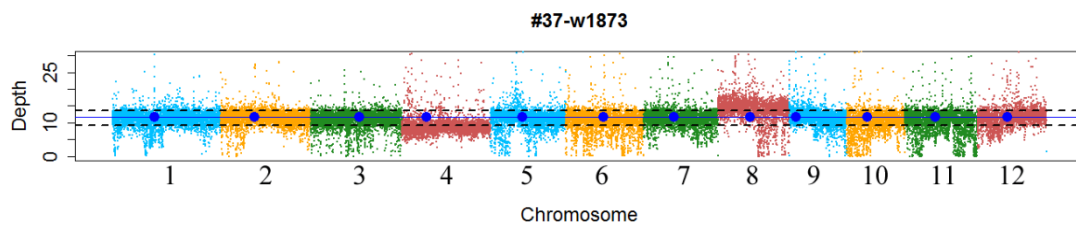

**#38 (-1 Chr. 04; +1 Chr. 11)**

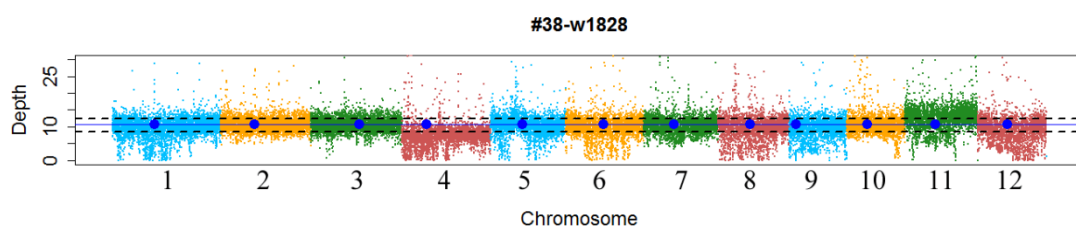



**#39 (+1 Chr. 05; +1 Chr. 06)**

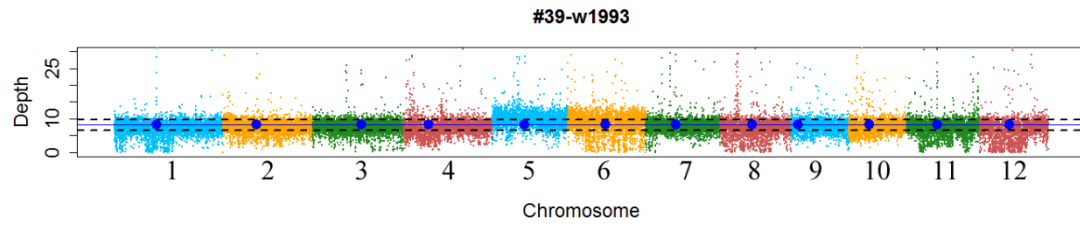

**#40 (+1 Chr. 07; +1 Chr. 10)**

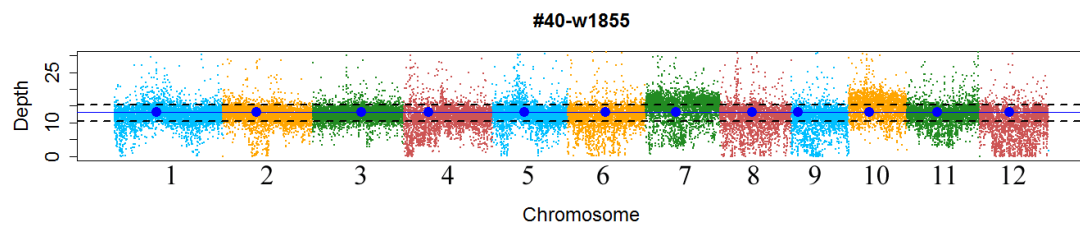

**#41 (+1 Chr. 07; -1 Chr. 10)**

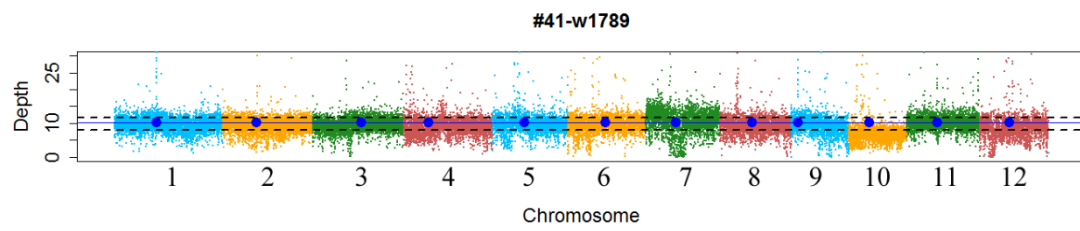

**#42 (+1 Chr. 07; +1 Chr. 11)**

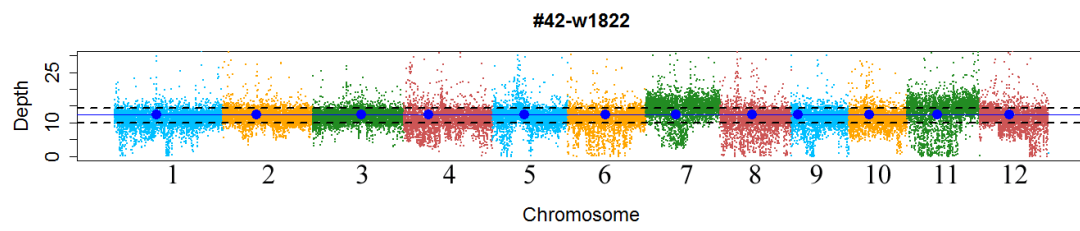

**#43 (+1 Chr. 08; +1 Chr. 09)**

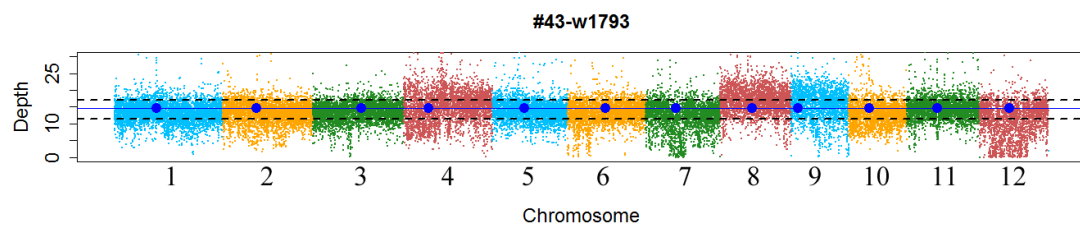

**#44 (+1 Chr. 08; +1 Chr. 12)**

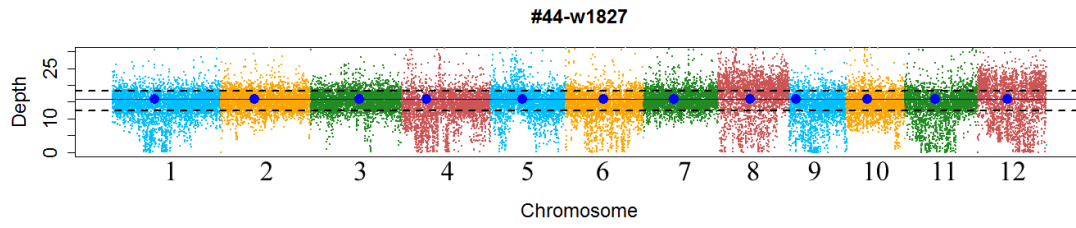

**#45 (+1 Chr. 09; +1 Chr. 11)**

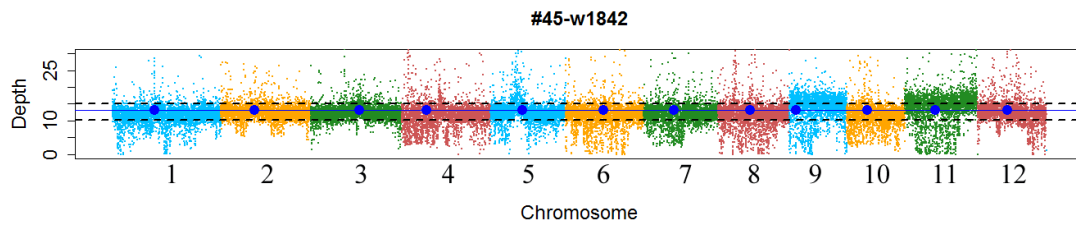

**#46 (+1 Chr. 10; +1 Chr. 12)**

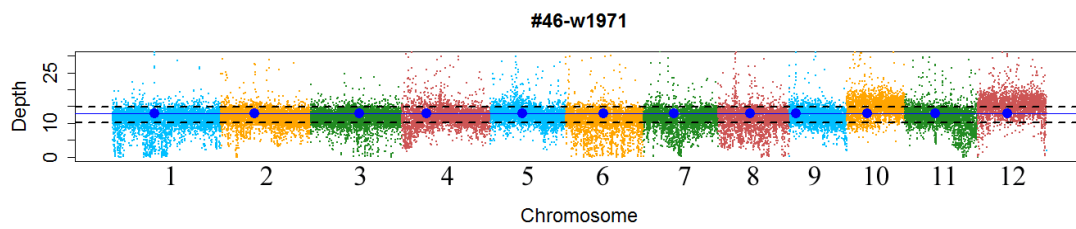

**#47 (-1 Chr. 10; +1 Chr. 11)**

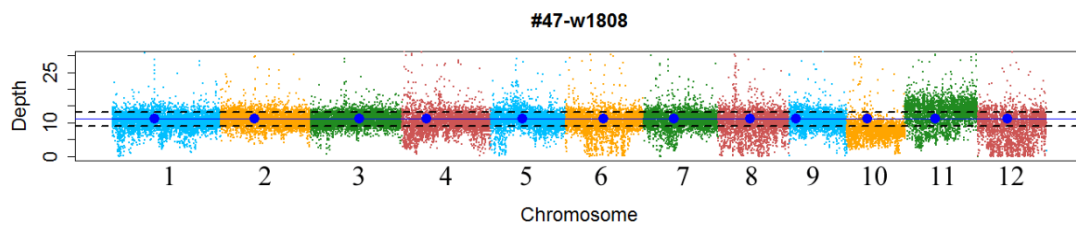

**#48 (+2L Chr. 05; +1 Chr. 09)**

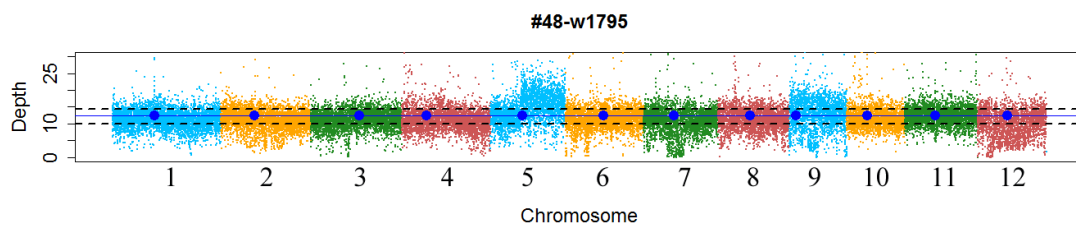

**#49 (+2 Chr. 09; -1 Chr. 12)**

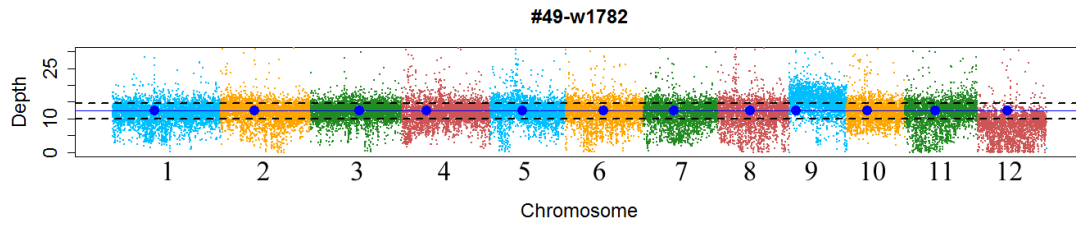

**#50 (-2 Chr. 09; +1 Chr. 11)**

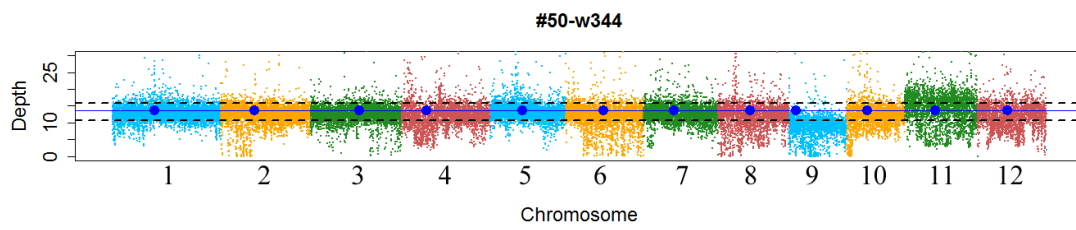

**#51 (+1 Chr. 04; +1 Chr. 07; +1 Chr. 11)**

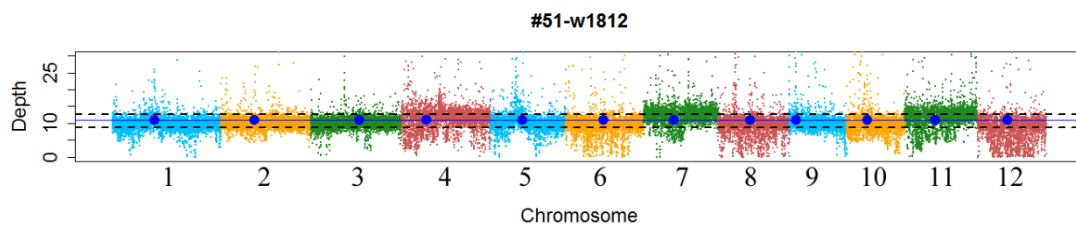

**#52 (-1 Chr. 04; +1 Chr. 06; +1 Chr. 11)**

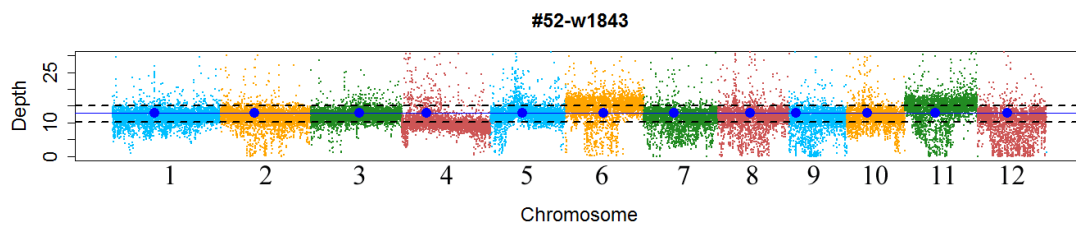

**#53 (+1 Chr. 05; +1 Chr. 08; -1 Chr. 12)**

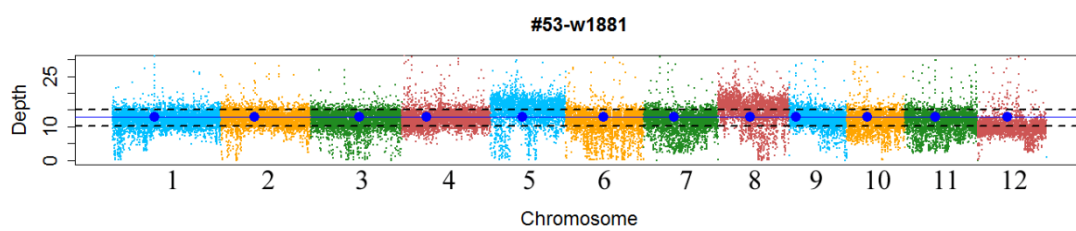

**#54 (-1S Chr. 04; +2S Chr. 11; -1L Chr. 11)**

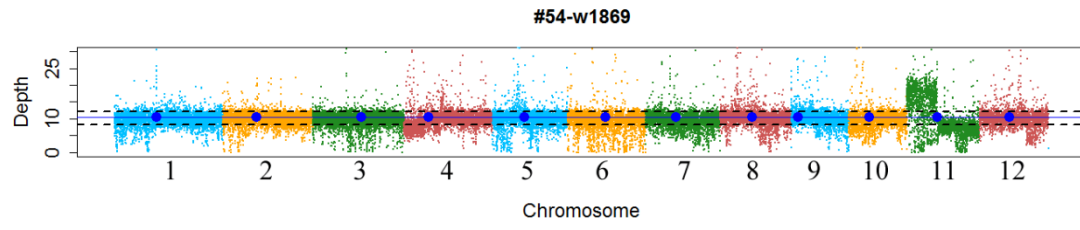

**#55 (-1L Chr. 01; +1/2S Chr. 01; -1L Chr. 06; -1L Chr. 12)**

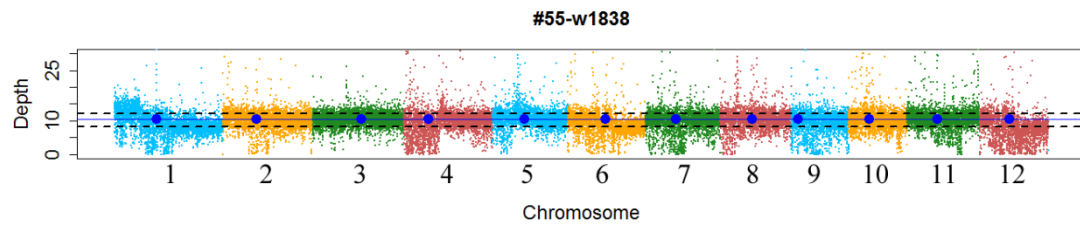

Supplement: 122_2018_3077_MOESM8_ESM.pdf [file 122_2018_3077_MOESM8_ESM.pdf]
